# Supplementary material for: A Bioinformatic Method For Identifying Group II Introns In Organella Genomes
Source: Front Genet. 2019 Nov 14;10:1135. doi: 10.3389/fgene.2019.01135 (PMC6867995; doi:10.3389/fgene.2019.01135)
Supplement: Supplementary file 2 [file Table_1.doc]

sample_size
yadd
alpha
beta
nuclear
mitochondrial
chloroplast
plastid
GUGCG
UUGCG
GGGCG
training long
17
11
14
6
0
17
0
0
14
1
1
training short
10
0
9
4
0
10
0
0
10
0
0
predicted long
13
9
10
7
2
5
0
0
11
2
0
predicted short
5
0
4
0
0
3
0
0
5
0
0
Magnoliopsida homologous
64
0
64
0
14
0
12
0
0
64
0
Solanoideae identical
315
0
315
315
2
2
115
196
0
315
0
